# Supplementary material
Source: publisher figshare collection journal article supplement (https://diabetesjournals.figshare.com/ndownloader/files/26113157)

**Obstructive Sleep Apnea, Glucose Tolerance and Beta-Cell Function in Adults with  
Prediabetes or Untreated Type 2 Diabetes: A Cross-Sectional Analysis of the Restoring Insulin  
Secretion (RISE) Study**

Babak Mokhlesi, M.D., M.Sc.,<sup>1</sup> Ashley H. Tjaden, MPH,<sup>2</sup> Karla A. Temple, PhD, RDN,<sup>1</sup> Sharon L. Edelstein, ScM,<sup>2</sup> Susan Sam, MD, M.Sc.,<sup>1</sup> Kristen J. Nadeau, MD, MS,<sup>3</sup> Tamara S. Hannon, MD, MS,<sup>4</sup> Shalini Manchanda, MD,<sup>4</sup> Kieren J. Mather, MD,<sup>4</sup> Steven E. Kahn, MB, ChB,<sup>5</sup> David A. Ehrmann, MD,<sup>1</sup> Eve Van Cauter, PhD,<sup>1</sup> The RISE Consortium\*

<sup>1</sup>University of Chicago, Chicago, IL; <sup>2</sup>George Washington University Biostatistics Center (RISE Coordinating Center), Rockville, MD; <sup>3</sup>University of Colorado Anschutz Medical Campus/Children's Hospital Colorado, Denver, CO; <sup>4</sup>Indiana University School of Medicine, Indianapolis, IN; <sup>5</sup>VA Puget Sound Health Care System and University of Washington, Seattle, WA

## **ADDITIONAL RESULTS**

The associations between OSA severity categories was performed after excluding the 49 participants who reported using CPAP (regardless of the level of adherence to CPAP). OSA severity, either using continuous variables (AHI, 3% and 4% oxygen desaturation indices, T90) or categories of severity, was not associated with fasting or 2-h glucose, HOMA-IR, insulin sensitivity or beta-cell response (supplemental Table 2 and supplemental figures 2 and 3).

**Supplemental Table 1. Participant characteristics based on diabetes status**

|                                                         | All<br>N=221     | Prediabetes<br>N=162 | Type 2 Diabetes<br>N=59 | p-value* |
|---------------------------------------------------------|------------------|----------------------|-------------------------|----------|
| <b>Demographics</b>                                     |                  |                      |                         |          |
| Age, years                                              | 54.5 ± 8.7       | 54.3 ± 8.7           | 55.0 ± 8.8              | 0.597    |
| Men, n (%)                                              | 127 (57.5%)      | 92 (56.8%)           | 35 (59.3%)              | 0.736    |
| Race/ethnicity, n (%)                                   |                  |                      |                         | 0.936    |
| White                                                   | 122 (55.2%)      | 90 (55.6%)           | 32 (54.2%)              |          |
| Black                                                   | 72 (32.6%)       | 52 (32.1%)           | 20 (33.9%)              |          |
| Hispanic (any)                                          | 11 (5.0%)        | 7 (4.3%)             | 4 (6.8%)                |          |
| Asian                                                   | 10 (4.5%)        | 8 (4.9%)             | 2 (3.4%)                |          |
| American Indian                                         | 1 (0.5%)         | 1 (0.6%)             | 0 (0.0%)                |          |
| Mixed                                                   | 5 (2.3%)         | 4 (2.5%)             | 1 (1.7%)                |          |
| Weight, kg                                              | 102.7 ± 18.5     | 103.4 ± 18.5         | 100.8 ± 18.6            | 0.365    |
| Waist, cm                                               | 112.5 ± 13.2     | 113.3 ± 13.5         | 110.3 ± 12.3            | 0.137    |
| Waist-to-Hip Ratio                                      | 1.0 ± 0.1        | 1.0 ± 0.1            | 1.0 ± 0.1               | 0.515    |
| BMI, kg/m <sup>2</sup>                                  | 35.1 ± 5.5       | 35.3 ± 5.5           | 34.3 ± 5.7              | 0.245    |
| Obese (BMI ≥30 kg/m <sup>2</sup> ), n (%)               | 176 (80.0%)      | 131 (81.4%)          | 45 (76.3%)              | 0.403    |
| Systolic BP, mmHg                                       | 126.6 ± 13.3     | 127.0 ± 13.2         | 125.5 ± 13.7            | 0.465    |
| Diastolic BP, mmHg                                      | 77.0 ± 10.6      | 76.9 ± 10.9          | 77.2 ± 10.0             | 0.838    |
| HbA1c, %                                                | 5.76 ± 0.40      | 5.70 ± 0.37          | 5.90 ± 0.44             | <.001    |
| Epworth Sleepiness Scale                                | 8.5 ± 4.6        | 8.7 ± 4.6            | 7.8 ± 4.7               | 0.192    |
| Sleepy (Epworth >10), n (%)                             | 82 (37.1%)       | 65 (40.1%)           | 17 (28.8%)              | 0.124    |
| CPAP adherent, n (%) <sup>†</sup>                       | 41 (18.6%)       | 31 (19.1%)           | 10 (16.9%)              | 0.711    |
| CPAP use in subset adherent to CPAP, h/night, N=41      | 6.2 ± 1.1        | 6.1 ± 1.4            | 6.3 ± 1.1               | 0.621    |
| <b>Actigraphy Measurements</b>                          |                  |                      |                         |          |
| Sleep time, h                                           | 6.57 ± 0.95      | 6.55 ± 0.98          | 6.63 ± 0.89             | 0.595    |
| Activity duration, min                                  | 996 ± 111        | 1001 ± 124           | 982 ± 63                | 0.267    |
| Percent immobility                                      | 20.4 ± 8.9       | 20.3 ± 8.9           | 20.4 ± 8.9              | 0.985    |
| Total activity count                                    | 231840 ± 76307   | 231337 ± 77016       | 233219 ± 74960          | 0.872    |
| Activity counts/min                                     | 233 ± 76         | 232 ± 76             | 237 ± 76                | 0.691    |
| <b>PSG Measurements</b>                                 |                  |                      |                         |          |
| Total recording time, min                               | 453.4 ± 45.1     | 450.1 ± 47.3         | 462.4 ± 37.1            | 0.073    |
| Total sleep time, min                                   | 360.5 ± 72.5     | 357.0 ± 73.8         | 370.1 ± 68.6            | 0.238    |
| Sleep efficiency, %                                     | 79.40 ± 13.62    | 79.07 ± 13.86        | 80.31 ± 13.04           | 0.551    |
| Sleep efficiency, %                                     | 84.2             | 83.4                 | 84.3                    |          |
| Median (25 <sup>th</sup> , 75 <sup>th</sup> percentile) | [73.8, 89.5]     | [75.1, 89.8]         | [71.9, 89.5]            | 0.674    |
| REM sleep, %                                            | 16.93 ± 7.75     | 16.69 ± 7.72         | 17.58 ± 7.85            | 0.449    |
| REM sleep, %                                            | 17.3             | 18.4                 | 17.2                    |          |
| Median (25 <sup>th</sup> , 75 <sup>th</sup> percentile) | [12.2, 22.2]     | [12.9, 22.3]         | [12.0, 22.2]            | 0.617    |
| N3 sleep, %                                             | 13.3 ± 10.0      | 13.4 ± 10.0          | 12.9 ± 10.2             | 0.755    |
| N3 sleep, %                                             | 12.3 [4.4, 19.9] | 13.0 [4.5, 19.9]     | 11.8 [3.8, 21.3]        | 0.727    |
| Median (25 <sup>th</sup> , 75 <sup>th</sup> percentile) |                  |                      |                         |          |
| AHI, events/h                                           | 33.8 ± 29.3      | 33.6 ± 29.4          | 34.4 ± 29.2             | 0.853    |
| AHI, events/h                                           | 25.6             | 27.1                 | 24.2                    |          |
| Median (25 <sup>th</sup> , 75 <sup>th</sup> percentile) | [13.5, 45.9]     | [12.7, 45.9]         | [13.5, 44.1]            | 0.745    |
| REM AHI, events/h                                       | 38.25 ± 25.03    | 38.30 ± 24.59        | 38.12 ± 26.39           | 0.962    |
| REM AHI, events/h                                       | 35.5             | 36.9                 | 35.5                    |          |
| Median (25 <sup>th</sup> , 75 <sup>th</sup> percentile) | [17.1, 59.1]     | [16.5, 60.0]         | [17.3, 56.8]            | 0.901    |
| Non-REM AHI, events/h                                   | 32.41 ± 31.70    | 31.96 ± 31.48        | 33.64 ± 32.54           | 0.729    |
| Non-REM AHI, events/h                                   | 23.0             | 24.3                 | 22.2                    |          |
| Median (25 <sup>th</sup> , 75 <sup>th</sup> percentile) | [8.2, 44.1]      | [8.0, 47.4]          | [8.2, 43.8]             | 0.768    |

|                                                         |               |               |               |       |
|---------------------------------------------------------|---------------|---------------|---------------|-------|
| 3% ODI, events/h                                        | 24.4 ± 23.9   | 24.4 ± 23.9   | 24.4 ± 24.1   | 0.996 |
| 3% ODI, events/h                                        | 16.4          | 15.9          | 16.5          |       |
| Median (25 <sup>th</sup> , 75 <sup>th</sup> percentile) | [7.4 , 33.5]  | [5.6 , 35.2]  | [8.3 , 31.7]  | 0.760 |
| 4% ODI, events/h                                        | 18.8 ± 22.3   | 18.8 ± 22.2   | 18.9 ± 22.8   | 0.975 |
| 4% ODI, events/h                                        | 10.0          | 9.2           | 10.2          |       |
| Median (25 <sup>th</sup> , 75 <sup>th</sup> percentile) | [4.3 , 25.2]  | [3.1 , 27.0]  | [5.1 , 22.8]  | 0.542 |
| Microarousal index, events/h                            | 28.9 ± 20.7   | 28.7 ± 20.9   | 29.5 ± 20.4   | 0.798 |
| Microarousal index, events/h                            | 23.4          | 24.5          | 22.4          |       |
| Median (25 <sup>th</sup> , 75 <sup>th</sup> percentile) | [14.1 , 35.9] | [14.2 , 37.6] | [13.8 , 35.3] | 0.640 |
| T90, % <sup>‡</sup>                                     | 15.1 ± 21.6   | 15.4 ± 22.1   | 14.2 ± 20.4   | 0.722 |
| T90, % <sup>‡</sup>                                     | 5.0           | 5.0           | 5.1           |       |
| Median (25 <sup>th</sup> , 75 <sup>th</sup> percentile) | [1.1 , 18.4]  | [0.4 , 18.4]  | [1.2 , 18.6]  | 0.539 |

Data presented as mean ± standard deviation unless otherwise specified.

\* ANOVA for continuous variables and chi-square for categorical variables.

<sup>†</sup> CPAP adherence defined as self-report of using CPAP ≥4 hours on ≥5 nights per week

<sup>‡</sup> T90: Percent of total sleep time with oxygen saturation below 90%.

**Supplemental Table 2: Adjusted metabolic outcomes based on OSA severity categories after excluding 49 participants who reported using CPAP**

| <b>Dependent</b>                 | <b>OSA Category</b> | <b>Adj Mean</b> | <b>Lower 95% CI</b> | <b>Upper 95% CI</b> | <b>p-value</b> |
|----------------------------------|---------------------|-----------------|---------------------|---------------------|----------------|
| <b>HbA1c</b>                     | Severe (N=67)       | 5.6504          | 5.5012              | 5.7996              | 0.1630         |
|                                  | Moderate (N=46)     | 5.5204          | 5.3568              | 5.6840              |                |
|                                  | No/Mild (N=59)      | 5.6568          | 5.5099              | 5.8037              |                |
| <b>Fasting Glucose</b>           | Severe (N=67)       | 111.13          | 106.62              | 115.63              | 0.3034         |
|                                  | Moderate (N=46)     | 114.08          | 109.14              | 119.03              |                |
|                                  | No/Mild (N=59)      | 110.56          | 106.12              | 114.99              |                |
| <b>2-Hour Glucose</b>            | Severe (N=67)       | 176.2           | 161.1               | 191.29              | 0.9967         |
|                                  | Moderate (N=46)     | 175.98          | 159.43              | 192.54              |                |
|                                  | No/Mild (N=59)      | 176.65          | 161.79              | 191.51              |                |
| <b>iAUC Glucose</b>              | Severe (N=67)       | 10788.8         | 9165.87             | 12411.7             | 0.3508         |
|                                  | Moderate (N=46)     | 9557.93         | 7771.88             | 11344               |                |
|                                  | No/Mild (N=59)      | 10399.5         | 8804.54             | 11994.4             |                |
| <b>Insulinogenic Index</b>       | Severe (N=67)       | 90.65           | 70.16               | 117.14              | 0.2185         |
|                                  | Moderate (N=46)     | 94.21           | 70.96               | 125.09              |                |
|                                  | No/Mild (N=59)      | 74.59           | 57.99               | 95.95               |                |
| <b>C-Peptide Index</b>           | Severe (N=67)       | 7.07            | 5.77                | 8.67                | 0.3177         |
|                                  | Moderate (N=46)     | 7.46            | 5.96                | 9.35                |                |
|                                  | No/Mild (N=59)      | 6.3             | 5.16                | 7.7                 |                |
| <b>HOMA-IR</b>                   | Severe (N=67)       | 3.83            | 3.07                | 4.77                | 0.0835         |
|                                  | Moderate (N=46)     | 4.24            | 3.34                | 5.4                 |                |
|                                  | No/Mild (N=59)      | 3.24            | 2.61                | 4.02                |                |
| <b>Insulin Sensitivity (M/I)</b> | Severe (N=67)       | 47.3008         | 36.7970             | 60.8030             | 0.3012         |
|                                  | Moderate (N=46)     | 40.3678         | 30.6530             | 53.1615             |                |
|                                  | No/Mild (N=59)      | 49.3743         | 38.5604             | 63.2208             |                |
| <b>ACPRmax</b>                   | Severe (N=67)       | 17.7241         | 15.0297             | 20.9016             | 0.4781         |
|                                  | Moderate (N=46)     | 16.3479         | 13.6472             | 19.5829             |                |
|                                  | No/Mild (N=59)      | 16.0251         | 13.6191             | 18.8560             |                |
| <b>ACPRg</b>                     | Severe (N=67)       | 3.1237          | 2.6154              | 3.7309              | 0.7392         |
|                                  | Moderate (N=46)     | 3.2467          | 2.6729              | 3.9437              |                |
|                                  | No/Mild (N=59)      | 3.3659          | 2.8249              | 4.0105              |                |
| <b>SS C-Peptide</b>              | Severe (N=67)       | 11.7704         | 10.7125             | 12.9328             | 0.8910         |
|                                  | Moderate (N=46)     | 11.5187         | 10.3901             | 12.7700             |                |
|                                  | No/Mild (N=59)      | 11.5429         | 10.5188             | 12.6668             |                |

ACPRg: Acute (first phase) C-peptide response to glucose; ACPRmax: Acute C-peptide response to arginine at maximal glycemic potentiation; iAUC: incremental glucose area under the curve; HOMA-IR: homeostatic model assessment insulin resistance; SS C-Peptide: steady state C-peptide

**Supplemental Figure 1. Consort diagram**

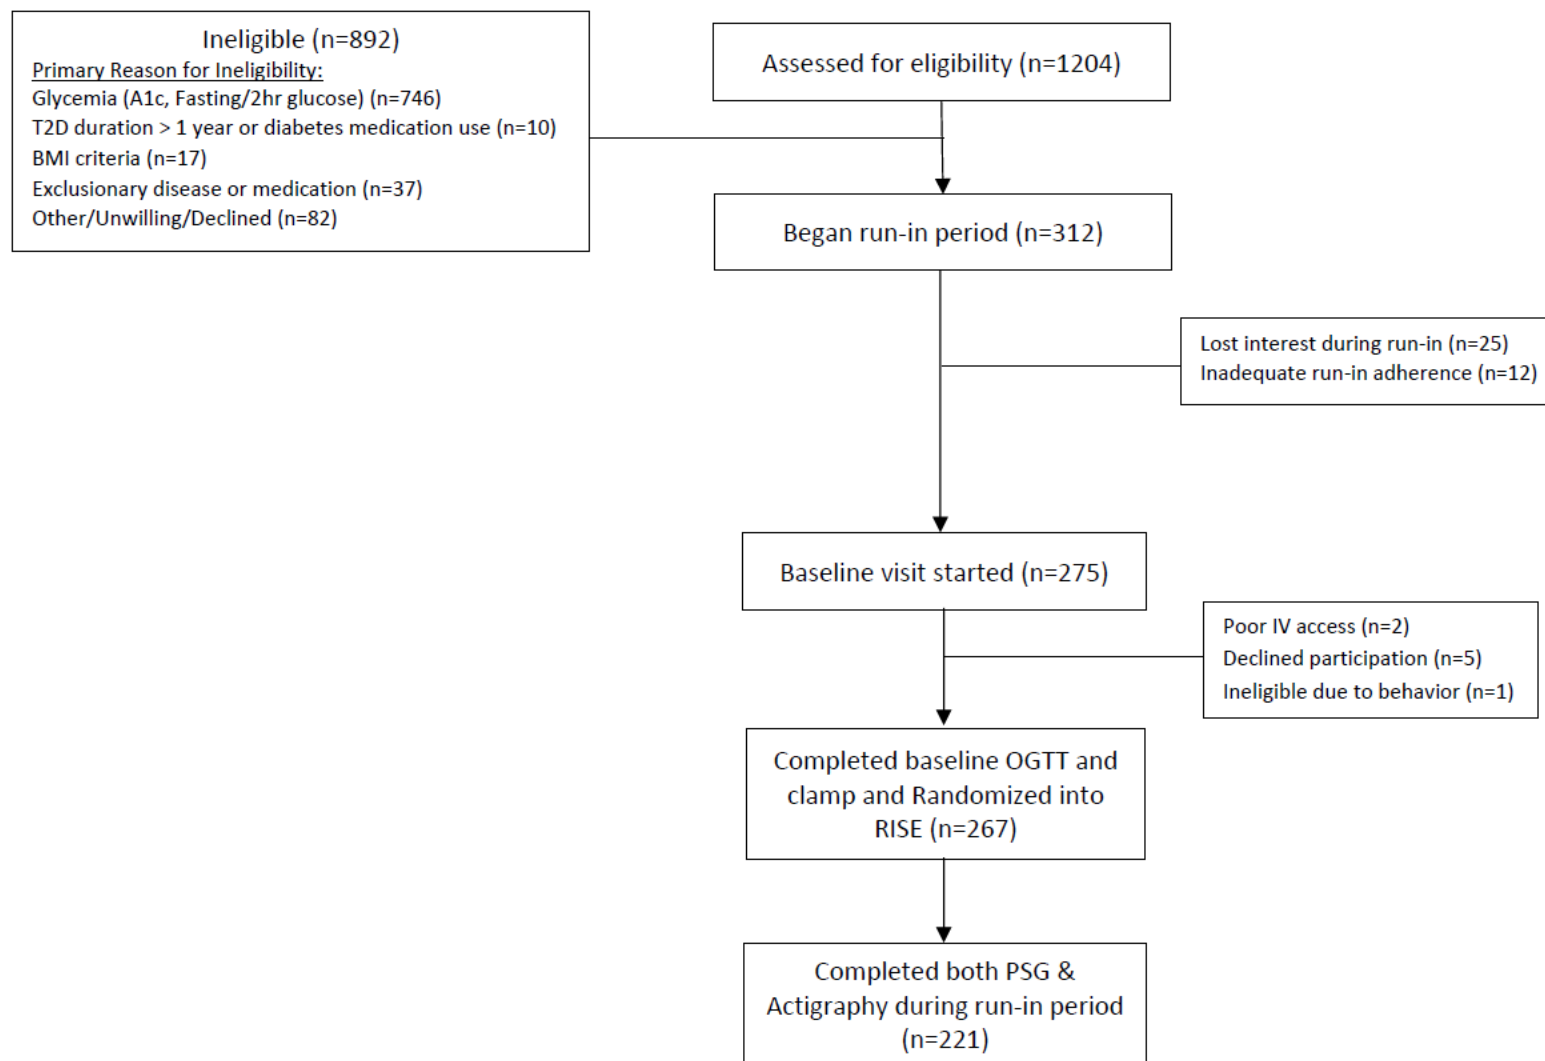

**Supplemental Figure 2.** Effect of obstructive sleep apnea on insulin sensitivity and beta-cell function as assessed by the hyperglycemic clamp after the exclusion of participants who reported using CPAP

**Supplemental Figure 2 legend:** Adjusted means from multiple linear regression models for relationship of log-transformed dependent variables (insulin sensitivity and beta-cell function as assessed by the hyperglycemic clamp) with categories of OSA severity. Data shown are least square means and 95% CI adjusted for age, sex, race/ethnicity, BMI, waist-to-hip ratio, and actigraphically measured sleep duration and physical activity. Steady state C-peptide, ACPRg, and ACPRmax are also adjusted for log insulin sensitivity (M/I).

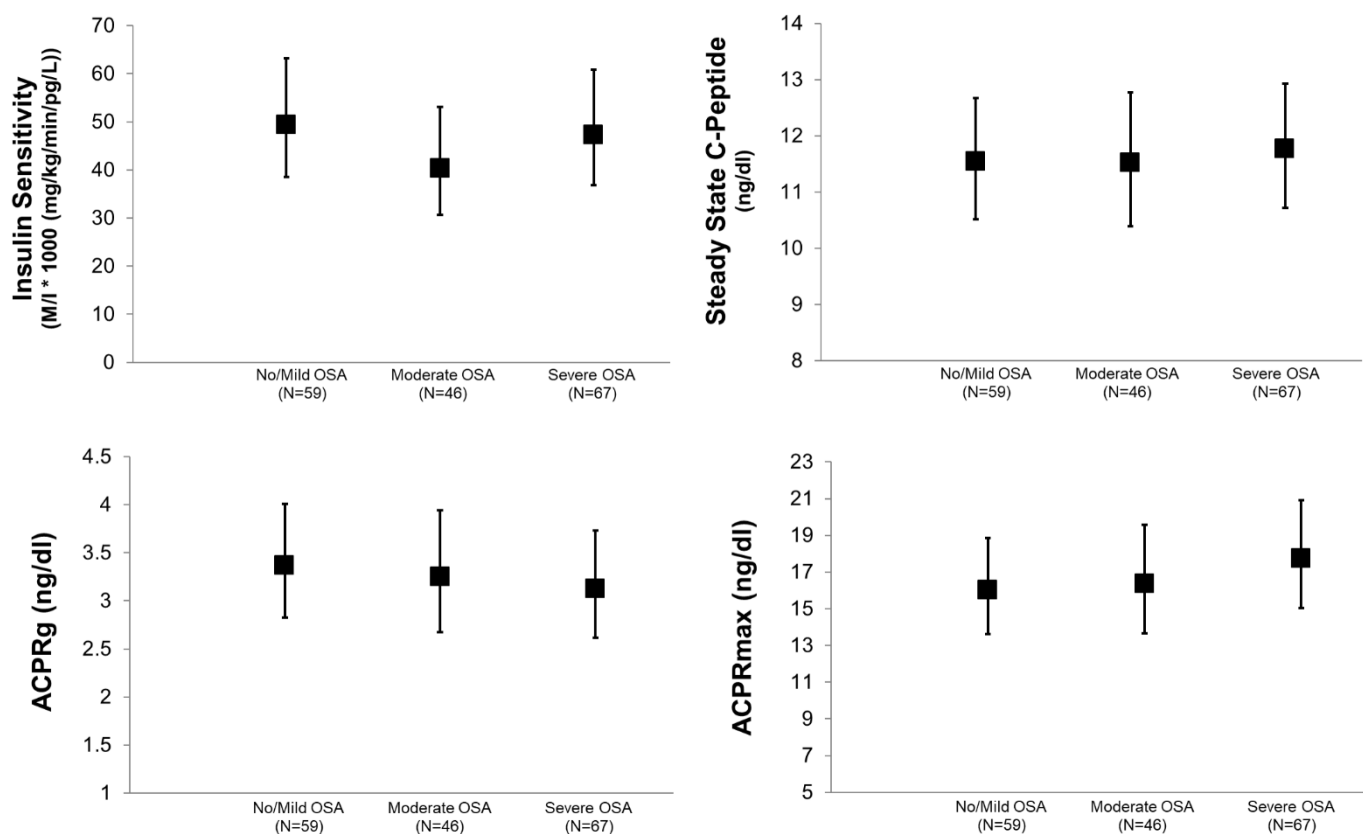

**Supplemental Figure 3.** Effect of obstructive sleep apnea on HbA1c and measures of glycaemia as assessed by the oral glucose tolerance test after the exclusion of participants who reported using CPAP

**Supplemental Figure 3 legend:** Adjusted means from multiple linear regression models for relationship of dependent variables (glycemia as assessed by the 3-h OGTT) with categories of OSA severity. Data shown are least square means and 95% CI adjusted for age, sex, race/ethnicity, BMI, waist-to-hip ratio, and actigraphically measured sleep duration and physical activity. IGI, CPI, and HOMA-IR were log-transformed for analyses.

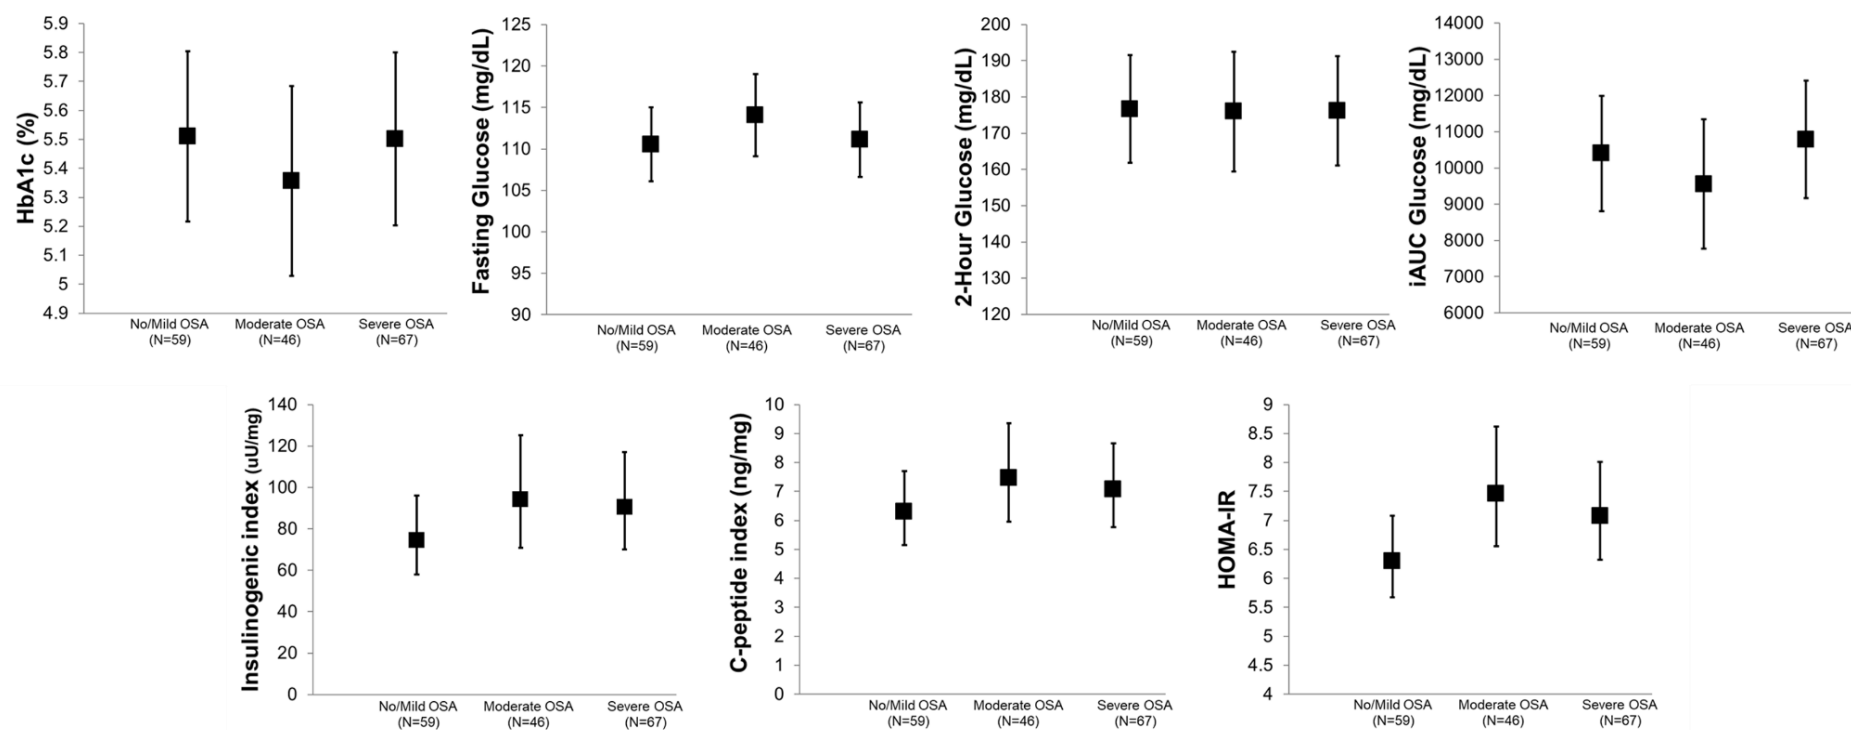

Supplement: Supplementary file 1 [file 26113157]
